# Supplementary material for: Regulation of Autophagic Signaling by Mechanical Loading and Inflammation in Human PDL Fibroblasts
Source: PubMed Central journal article supplement (PMC7763506; doi:10.3390/ijms21249446), 2020-12-11
Supplement: ijms-21-09446-s001.pdf [file ijms-21-09446-s001.pdf]

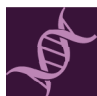

## Supplementary Materials

**Table S1.** Fold changes between samples. Table S1 shows fold changes between treatment samples in comparison to controls. Table S1 contains all investigated targets associated to the autophagy regulation pathway mTOR.

| Antibody List                                                                   | 2 g/cm <sup>2</sup> /Control | 8 g/cm <sup>2</sup> /Control | 11-1 $\beta$ /Control |
|---------------------------------------------------------------------------------|------------------------------|------------------------------|-----------------------|
| 4E-BP1 (Ab-36)                                                                  | 0.92                         | 0.86                         | 0.86                  |
| 4E-BP1 (Ab-45)                                                                  | 0.84                         | 0.95                         | 0.85                  |
| 4E-BP1 (Ab-65)                                                                  | 1.34                         | 0.94                         | 0.65                  |
| 4E-BP1 (Ab-70)                                                                  | 0.95                         | 0.87                         | 0.93                  |
| 4E-BP1 (Phospho-Ser65)                                                          | 1.12                         | 1.16                         | 1.09                  |
| 4E-BP1 (Phospho-Thr36)                                                          | 1.01                         | 1.01                         | 1.02                  |
| 4E-BP1 (Phospho-Thr45)                                                          | 0.61                         | 1.12                         | 0.81                  |
| 4E-BP1 (Phospho-Thr70)                                                          | 0.98                         | 1.14                         | 1.02                  |
| 6-Phosphofructo-2-Kinase (PFKFB2) (inter)                                       | 0.84                         | 0.84                         | 0.85                  |
| 6-phosphofructo-2-kinase/fructose-2,6-biphosphatase 2 (PFKFB2) (Ab-483)         | 1.15                         | 1.26                         | 1.03                  |
| 6-phosphofructo-2-kinase/fructose-2,6-biphosphatase 2 (PFKFB2) (Phospho-Ser483) | 0.92                         | 1.01                         | 0.84                  |
| AKT (Ab-308)                                                                    | 0.85                         | 0.68                         | 0.71                  |
| AKT (Ab-326)                                                                    | 1.07                         | 1.45                         | 1.03                  |
| AKT (Ab-473)                                                                    | 0.88                         | 0.69                         | 0.87                  |
| AKT (Phospho-Ser473)                                                            | 1.01                         | 0.91                         | 1.03                  |
| AKT (Phospho-Thr308)                                                            | 0.60                         | 0.58                         | 0.77                  |
| AKT (Phospho-Tyr326)                                                            | 1.01                         | 1.17                         | 0.93                  |
| AKT1 (Ab-124)                                                                   | 0.78                         | 0.73                         | 0.73                  |
| AKT1 (Ab-246)                                                                   | 0.88                         | 1.02                         | 0.87                  |
| AKT1 (Ab-450)                                                                   | 0.97                         | 0.77                         | 0.82                  |
| AKT1 (Ab-474)                                                                   | 0.81                         | 0.98                         | 0.80                  |
| AKT1 (Ab-72)                                                                    | 0.91                         | 1.08                         | 0.86                  |
| AKT1 (Phospho-Ser124)                                                           | 1.08                         | 1.22                         | 1.17                  |
| AKT1 (Phospho-Ser246)                                                           | 1.08                         | 1.03                         | 0.98                  |
| AKT1 (Phospho-Thr450)                                                           | 1.11                         | 1.08                         | 1.24                  |
| AKT1 (Phospho-Thr72)                                                            | 0.93                         | 0.85                         | 0.92                  |
| AKT1 (Phospho-Tyr474)                                                           | 0.80                         | 0.71                         | 0.82                  |
| AKT1S1 (Ab-246)                                                                 | 0.81                         | 0.88                         | 0.69                  |
| AKT1S1 (Phospho-Thr246)                                                         | 0.91                         | 0.94                         | 0.89                  |
| AKT2 (Ab-474)                                                                   | 1.00                         | 0.84                         | 0.78                  |
| AKT2 (Phospho-Ser474)                                                           | 0.79                         | 0.90                         | 0.72                  |
| AMPK1/AMPK2 (Ab-183/172)                                                        | 0.95                         | 1.07                         | 0.97                  |
| AMPK1/AMPK2 (Ab-485/491)                                                        | 1.03                         | 0.79                         | 0.96                  |
| AMPK1/AMPK2 (Phospho-Ser485/491)                                                | 1.06                         | 1.02                         | 1.00                  |
| AMPK1/AMPK2 (Phospho-Thr183/172)                                                | 1.09                         | 1.12                         | 0.83                  |
| AMPKbeta1 (Ab-182)                                                              | 1.04                         | 0.97                         | 0.91                  |
| AMPKbeta1 (Phospho-Ser182)                                                      | 1.13                         | 1.25                         | 1.24                  |
| BAD (Ab-112)                                                                    | 1.00                         | 0.86                         | 0.88                  |
| BAD (Ab-134)                                                                    | 0.90                         | 0.75                         | 0.89                  |
| BAD (Ab-136)                                                                    | 1.00                         | 0.77                         | 0.88                  |
| BAD (Ab-155)                                                                    | 1.03                         | 0.87                         | 0.94                  |
| BAD (Ab-91/128)                                                                 | 1.13                         | 0.74                         | 0.87                  |
| BAD (Phospho-Ser112)                                                            | 0.89                         | 0.85                         | 0.65                  |
| BAD (Phospho-Ser134)                                                            | 0.95                         | 0.98                         | 0.79                  |
| BAD (Phospho-Ser136)                                                            | 0.81                         | 0.79                         | 0.76                  |

|                                              |      |      |      |
|----------------------------------------------|------|------|------|
| BAD (Phospho-Ser155)                         | 0.97 | 1.04 | 0.95 |
| BAD (Phospho-Ser91/128)                      | 1.01 | 1.20 | 1.07 |
| Beta actin                                   | 1.08 | 0.94 | 0.80 |
| CBP (inter)                                  | 0.88 | 0.82 | 0.80 |
| CBPN (inter)                                 | 0.82 | 0.86 | 0.83 |
| eIF2A (Ab-51)                                | 0.97 | 0.95 | 0.86 |
| eIF2A (Phospho-Ser51)                        | 1.01 | 1.05 | 0.98 |
| eIF4B (Phospho-Ser422)                       | 0.99 | 1.13 | 1.02 |
| eIF4E (Ab-209)                               | 0.86 | 0.93 | 0.95 |
| eIF4E (Phospho-Ser209)                       | 0.94 | 1.07 | 0.95 |
| eIF4G (Ab-1108)                              | 0.96 | 1.12 | 0.77 |
| eIF4G (Phospho-Ser1108)                      | 1.24 | 1.10 | 0.91 |
| ERK1/2 (N-term)                              | 0.69 | 0.61 | 0.61 |
| ERK1-p44/42 MAP Kinase (Ab-202)              | 0.86 | 0.91 | 0.89 |
| ERK1-p44/42 MAP Kinase (Ab-204)              | 0.80 | 0.90 | 0.83 |
| ERK1-p44/42 MAP Kinase (Phospho-Thr202)      | 0.91 | 0.91 | 0.83 |
| ERK1-p44/42 MAP Kinase (Phospho-Tyr204)      | 0.95 | 0.97 | 1.01 |
| ERK3 (Ab-189)                                | 0.83 | 0.65 | 0.81 |
| ERK3 (Phospho-Ser189)                        | 1.13 | 1.28 | 1.13 |
| ERK8 (Phospho-Thr175/Tyr177)                 | 0.99 | 1.17 | 1.06 |
| GAPDH                                        | 1.06 | 1.08 | 1.16 |
| GSK3 $\alpha$ (Ab-21)                        | 0.96 | 0.95 | 0.89 |
| GSK3 $\alpha$ (Phospho-Ser21)                | 0.78 | 0.73 | 0.63 |
| GSK3 $\alpha$ - $\beta$ (Ab-216/279)         | 0.90 | 0.69 | 0.88 |
| GSK3 $\alpha$ - $\beta$ (Phospho-Tyr216/279) | 0.94 | 0.87 | 0.83 |
| GSK3 $\beta$ (Ab-9)                          | 1.32 | 1.36 | 1.27 |
| GSK3 $\beta$ (Phospho-Ser9)                  | 1.01 | 0.93 | 0.81 |
| IR (Phospho-Tyr1355)                         | 1.05 | 0.81 | 1.12 |
| IR (Phospho-Tyr1361)                         | 1.26 | 0.67 | 0.99 |
| LRP11 (inter)                                | 0.90 | 0.95 | 0.88 |
| LRP3 (inter)                                 | 1.01 | 1.12 | 1.07 |
| Mnk1 (Ab-385)                                | 0.85 | 0.83 | 0.89 |
| Mnk1 (Phospho-Thr385)                        | 0.99 | 1.38 | 1.21 |
| mTOR (Ab-2446)                               | 0.90 | 0.71 | 0.93 |
| mTOR (Ab-2448)                               | 1.07 | 0.87 | 0.83 |
| mTOR (Ab-2481)                               | 0.90 | 1.02 | 0.67 |
| mTOR (Phospho-Ser2448)                       | 0.91 | 1.13 | 0.93 |
| mTOR (Phospho-Ser2481)                       | 0.89 | 0.79 | 0.75 |
| mTOR (Phospho-Thr2446)                       | 0.75 | 1.00 | 0.93 |
| P70S6K (Ab-229)                              | 0.77 | 0.95 | 0.74 |
| P70S6K (Ab-371)                              | 1.10 | 1.19 | 1.08 |
| P70S6K (Ab-411)                              | 0.97 | 0.88 | 0.80 |
| P70S6K (Ab-418)                              | 0.85 | 0.86 | 0.74 |
| P70S6K (Ab-421)                              | 1.02 | 0.77 | 0.96 |
| P70S6K (Ab-424)                              | 0.91 | 0.94 | 0.83 |
| P70S6K (Ab-427)                              | 0.91 | 0.68 | 0.85 |
| P70S6K (Phospho-Ser371)                      | 1.27 | 1.38 | 1.31 |
| P70S6K (Phospho-Ser411)                      | 0.96 | 1.10 | 1.03 |
| P70S6K (Phospho-Ser418)                      | 1.69 | 1.90 | 1.73 |
| P70S6K (Phospho-Ser424)                      | 1.03 | 1.14 | 1.04 |
| P70S6K (Phospho-Thr229)                      | 1.18 | 1.19 | 1.14 |
| P70S6K (Phospho-Thr389)                      | 1.35 | 1.53 | 1.28 |
| P70S6K (Phospho-Thr421)                      | 0.96 | 0.94 | 0.92 |
| P70S6K beta (Ab-423)                         | 0.87 | 0.68 | 0.81 |
| P70S6K beta (Phospho-Ser423)                 | 1.12 | 1.09 | 0.96 |
| P90RSK (Ab-359/363)                          | 0.80 | 0.61 | 0.51 |

|                                                               |      |      |      |
|---------------------------------------------------------------|------|------|------|
| P90RSK (Ab-380)                                               | 0.89 | 0.86 | 0.82 |
| P90RSK (Ab-573)                                               | 0.95 | 0.92 | 0.88 |
| P90RSK (Phospho-Ser380)                                       | 1.09 | 0.92 | 1.12 |
| P90RSK (Phospho-Thr359/Ser363)                                | 1.79 | 0.94 | 1.21 |
| P90RSK (Phospho-Thr573)                                       | 1.18 | 1.04 | 1.29 |
| PDK1 (Ab-241)                                                 | 1.16 | 1.21 | 0.77 |
| PDK1 (Phospho-Ser241)                                         | 0.93 | 0.95 | 0.77 |
| PI3-kinase p85-alpha (Phospho-Tyr607)                         | 1.02 | 1.10 | 1.20 |
| PI3-kinase p85-subunit alpha/gamma (Ab-467/199)               | 0.95 | 0.65 | 0.62 |
| PI3-kinase p85-subunit alpha/gamma (Phospho-Tyr467/Tyr199)    | 1.08 | 1.10 | 0.99 |
| PIP5K (inter)                                                 | 1.01 | 0.99 | 1.26 |
| PIP5K (Phospho-Ser307)                                        | 1.33 | 1.58 | 1.14 |
| PKC alpha (Ab-657)                                            | 1.36 | 1.52 | 1.28 |
| PKC alpha (Phospho-Tyr657)                                    | 1.17 | 1.57 | 1.29 |
| PKC alpha/beta II (Ab-638)                                    | 0.94 | 1.20 | 0.91 |
| PKC alpha/beta II (Phospho-Thr638)                            | 1.09 | 1.06 | 1.08 |
| PLK1 (Ab-210)                                                 | 0.57 | 0.53 | 0.50 |
| PP2A-alpha (Ab-307)                                           | 0.84 | 0.82 | 0.59 |
| PP2A-alpha (Phospho-Tyr307)                                   | 1.11 | 0.96 | 1.12 |
| PPAR-beta (Ab-1457)                                           | 0.86 | 0.72 | 0.75 |
| PPAR-beta (Phospho-Thr1457)                                   | 0.97 | 1.04 | 0.96 |
| PPAR-gamma (Ab-112)                                           | 0.88 | 0.64 | 0.46 |
| PPAR-gamma (Phospho-Ser112)                                   | 1.26 | 1.33 | 1.12 |
| PTEN (Ab-370)                                                 | 0.64 | 0.73 | 0.55 |
| PTEN (Ab-380)                                                 | 1.14 | 0.99 | 0.63 |
| PTEN (Ab-380/382/383)                                         | 0.78 | 0.71 | 0.75 |
| PTEN (Phospho-Ser370)                                         | 1.23 | 1.10 | 1.14 |
| PTEN (Phospho-Ser380)                                         | 0.94 | 0.96 | 1.05 |
| PTEN (Phospho-Ser380/Thr382/Thr383)                           | 1.18 | 1.43 | 1.10 |
| Rho/Rac guanine nucleotide exchange factor 2 (Ab-885)         | 0.95 | 0.71 | 0.90 |
| Rho/Rac guanine nucleotide exchange factor 2 (Phospho-Ser885) | 0.94 | 1.17 | 1.02 |
| RhoA (Ab-188)                                                 | 0.93 | 0.90 | 0.83 |
| RSK1/2/3/4 (Ab-221/227/218/232)                               | 0.89 | 0.84 | 0.72 |
| RSK1/2/3/4 (Phospho-Ser221/227/218/232)                       | 1.10 | 1.27 | 0.99 |
| Tuberin (Ab-981)                                              | 0.57 | 0.46 | 0.54 |
| Tuberin/TSC2 (Ab-1462)                                        | 0.92 | 1.04 | 0.96 |
| Tuberin/TSC2 (Ab-939)                                         | 0.86 | 1.04 | 0.83 |
| Tuberin/TSC2 (Phospho-Ser939)                                 | 1.09 | 0.76 | 1.00 |
| Tuberin/TSC2 (Phospho-Thr1462)                                | 0.99 | 0.73 | 0.88 |

## References

1. Alqurashi, N.; Hashimi, S.M.; Alowaidi, F.; Ivanovski, S.; Wei, M.Q. Dual mTOR/PI3K inhibitor NVP-BEZ235 arrests colorectal cancer cell growth and displays differential inhibition of 4E-BP1. *Oncol. Rep.* **2018**, *40*, 1083–1092.
2. Antonioli, M.; Di Rienzo, M.; Piacentini, M.; Fimia, G.M. Emerging Mechanisms in Initiating and Terminating Autophagy. *Trends Biochem. Sci.* **2017**, *42*, 28–41.
3. Araujo, R.M.S.; Oba, Y.; Moriyama, K. Identification of Genes Related to Mechanical Stress in Human Periodontal Ligament Cells Using Microarray Analysis. *J. Periodontol.* **2007**, *42*, 15–22.
4. De Araujo, R.M.S.; Oba, Y.; Kuroda, S.; Tanaka, E.; Moriyama, K. RhoE regulates actin cytoskeleton organization in human periodontal ligament cells under mechanical stress. *Arch. Oral Biol.* **2014**, *59*, 187–192.
5. Bakker, A.D.; Gakes, T.; Hogervorst, J.M.A.; de Wit, G.M.J.; Klein-Nulend, J.; Jaspers, R.T. Mechanical Stimulation and IGF-1 Enhance mRNA Translation Rate in Osteoblasts Via Activation of the AKT-mTOR Pathway. *J. Cell Physiol.* **2016**, *231*, 1283–1290.
6. Barczyk, M.; Bolstad, A.I.; Gullberg, D. Role of integrins in the periodontal ligament: organizers and facilitators. *Periodontol.* **2013**, *63*, 29–47. doi: 10.1111/prd.12027.
7. Chen, Y.; Yang, K.; Zhou, Z.; Wang, L.; Du, Y.; Wang, X. Mechanical Stress Modulates the RANKL/OPG System of Periodontal Ligament Stem Cells via  $\alpha 7$  nAChR in Human Deciduous Teeth: An In Vitro Study. *Stem Cells Int.* **2019**, 1–12.
8. Chen, H.; Chen, L.; Cheng, B.; Jiang, C. Cyclic mechanical stretching induces autophagic cell death in tenofibroblasts through activation of prostaglandin E2 production. *Cell Physiol. Biochem.* **2015**, *36*, 24–33.
9. Cominelli, F.; Nast, C.C.; Llerena, R.; Dinarello, C.A.; Zipser, R.D. Interleukin 1 suppresses inflammation in rabbit colitis. Mediation by endogenous prostaglandins. *J. Clin. Invest.* **1990**, *85*, 582–586.
10. Ekim, B.; Magnuson, B.; Acosta-Jaquez, H.A.; Keller, J.A.; Feener, E.P.; Fingar, D.C. mTOR Kinase Domain Phosphorylation Promotes mTORC1 Signaling. Cell Growth. and Cell Cycle Progression. *Mol. Cell. Biol.* **2011**, *31*, 2787–2801.
11. Hannan, K.M.; Brandenburger, Y.; Jenkins, A.; Sharkey, K.; Cavanaugh, A.; Rothblum, L.; Moss, T.; Poortinga, G.; McArthur, G.A.; Pearson, R.B.; Hannan, R.D. mTOR-dependent regulation of ribosomal gene transcription requires S6K1 and is mediated by phosphorylation of the carboxy-terminal activation domain of the nucleolar transcription factor UBF. *Mol. Cell. Biol.* **2003**, *23*, 8862–8877.
12. Harris, J. Autophagy and cytokines. *Cytokine* **2011**, *56*, 140–144.
13. Huang, W.-P.; Klionsky, D.J. Autophagy in yeast: a review of the molecular machinery. *Cell Struct. Funct.* **2002**, *27*, 409–420.
14. Hudson, D.M.; Garibov, M.; Dixon, D.R.; Popowics, T.; Eyre, D.R. Distinct post-translational features of type I collagen are conserved in mouse and human periodontal ligament. *J. Periodontol.* **2017**, *52*, 1042–1049.
15. Kaku, M.; Yamauchi, M. Mechano-regulation of collagen biosynthesis in periodontal ligament. *J. Prosthodont. Res.* **2014**, *58*, 193–207.
16. Kanzaki, H.; Chiba, M.; Shimizu, Y.; Mitani, H. Periodontal ligament cells under mechanical stress induce osteoclastogenesis by receptor activator of nuclear factor kappaB ligand up-regulation via prostaglandin E2 synthesis. *J. Bone Miner. Res.* **2002**, *17*, 210–220.
17. King, J.S.; Veltman, D.M.; Insall, R.H. The induction of autophagy by mechanical stress. *Autophagy* **2011**, *7*, 1490–1499.
18. King, J.S. Mechanical stress meets autophagy: potential implications for physiology and pathology. *Trends Mol. Med.* **2012**, *18*, 583–588.
19. Kirschneck, C.; Küchler, E.C.; Wolf, M.; Spanier, G.; Proff, P.; Schröder, A. Effects of the Highly COX-2-Selective Analgesic NSAID Etoricoxib on Human Periodontal Ligament Fibroblasts during Compressive Orthodontic Mechanical Strain. *Mediators Inflamm.* **2019**, *2019*, 2514956.
20. Klionsky, D.J.; Abdelmohsen, K.; Abe, A.; Abedin, M.J.; Abeliovich, H.; Arozana, A.A.; Adachi, H.; Adams, C.M.; Adams, P.D.; Adeli, K.; et al. Guidelines for the use and interpretation of assays for monitoring autophagy (3rd edition). *Autophagy* **2016**, *12*, 1–222.
21. Lapaquette, P.; Guzzo, J.; Bretillon, L.; Bringer, M.-A. Cellular and Molecular Connections between Autophagy and Inflammation. *Mediators Inflamm.* **2015**, *2015*, 398483.

22. Lee, K.-W.; Yook, J.-Y.; Son, M.-Y.; Kim, M.-J.; Koo, D.-B.; Han, Y.-M.; Cho, Y.S. Rapamycin Promotes the Osteoblastic Differentiation of Human Embryonic Stem Cells by Blocking the mTOR Pathway and Stimulating the BMP/Smad Pathway. *Stem Cell. Dev.* **2010**, *19*, 557–568.
23. Li, L.; Jacox, L.A.; Little, S.H.; Ko, C.-C. Orthodontic tooth movement: The biology and clinical implications. *Kaohsing J. Med. Sci.* **2018**, *34*, 207–214.
24. Li, Y.; Li, M.; Tan, L.; Huang, S.; Zhao, L.; Tang, T.; Liu, J.; Zhao, Z. Analysis of time-course gene expression profiles of a periodontal ligament tissue model under compression. *Arch. Oral Biol.* **2013**, *58*, 511–522.
25. Ma, K.-G.; Shao, Z.-W.; Wang, J.; Wang, B.-C.; Xiong, L.-M.; Chen, S.-F. Autophagy is activated in compression-induced cell degeneration and is mediated by reactive oxygen species in nucleus pulposus cells exposed to compression. *Osteoarthritis Cartilage* **2013**, *21*, 2030–2038.
26. Mangan, D.F.; Welch, G.R.; Wahl, S.M. Lipopolysaccharide. tumor necrosis factor-alpha. and IL-1 beta prevent programmed cell death (apoptosis) in human peripheral blood monocytes. *J. Immunol.* **1991**, *146*, 1541–1546/
27. Marchesan, J.T.; Scanlon, C.S.; Soehren, S.; Matsuo, M.; Kapila, Y.L. Implications of cultured periodontal ligament cells for the clinical and experimental setting: a review. *Arch. Oral Biol.* **2011**, *56*, 933–943.
28. Mariño, G.; Niso-Santano, M.; Baehrecke, E.H.; Kroemer, G. Self-consumption: the interplay of autophagy and apoptosis. *Nat. Rev. Mol. Cell Biol.* **2014**, *15*, 81–94.
29. Memmert, S.; Damanaki, A.; Nogueira, A.V.B.; Eick, S.; Nokhbehshaim, M.; Papadopoulou, A.K.; Till, A.; Rath, B.; Jepsen, S.; Götz, W.; Piperi, C.; et al. Role of Cathepsin S in Periodontal Inflammation and Infection. *Mediators Inflamm.* **2017**, *2017*, 4786170.
30. Memmert, S.; Nogueira, A.V.B.; Damanaki, A.; Nokhbehshaim, M.; Eick, S.; Divnic-Resnik, T.; Spahr, A.; Rath-Deschner, B.; Till, A.; Götz, W.; et al. Damage-regulated autophagy modulator 1 in oral inflammation and infection. *Clin. Oral Investig.* **2018**, *22*, 2933–2941, doi: 10.1007/s00784-018-2381-6.
31. Memmert, S.; Damanaki, A.; Nohbehshaim, M.; Nogueira, A.V.B.; Eick, S.; Cirelli, J.A.; Jäger, J. Regulation of somatostatin receptor 2 by proinflammatory. microbial and obesity-related signals in periodontal cells and tissues. *Head Face Med.* **2019**, *15*, 2
32. Memmert, S.; Nogueira, A.V.B.; Damanaki, A.; Nokhbehshaim, M.; Rath-Deschner, B.; Götz, W.; Götz, L.; Cirelli, J.A.; Till, A.; Jäger, J.; et al. Regulation of the autophagy-marker Sequestosome 1 in periodontal cells and tissues by biomechanical loading. *J. Orofac. Orthop.* **2020**, *81*, 10–21.
33. Militi, A.; Cutroneo, G.; Favalaro, A.; Matarese, G.; Di Mauro, D.; Lauritano, F.; Centofanti, A.; Cervino, G.; Nicita, F.; Bramanti, A.; et al. An immunofluorescence study on VEGF and extracellular matrix proteins in human periodontal ligament during tooth movement. *Heliyon* **2019**, *5*, e02572.
34. Muendlein, H.I.; Sarhan, J.; Liu, B.C.; Connolly, W.M.; Schworer, S.A.; Smirnova, I.; Tang, A.Y.; Ilyukha, V.; Pietruska, J.; Tahmasebi, S.; et al. Constitutive Interferon Attenuates RIPK1/3-Mediated Cytokine Translation. *Cell Rep.* **2020**, *30*, 699–713.
35. Nakajima, R.; Yamaguchi, M.; Kojima, T.; Takano, M.; Kasai, K. Effects of compression force on fibroblast growth factor-2 and receptor activator of nuclear factor kappa B ligand production by periodontal ligament cells in vitro. *J. Periodontal Res.* **2008**, *43*, 168–173.
36. Pietrocola, F.; Izzo, V.; Niso-Santano, M.; Vacchelli, E.; Galluzzi, L.; Maiuri, M.C.; Kroemer, G. Regulation of autophagy by stress-responsive transcription factors. *Semin Cancer Biol.* **2013**, *23*, 310–322.
37. Reiling, J.H.; Sabatini, D.M. Stress and mTOR signaling. *Oncogene* **2006**, *25*, 6373–6383.
38. Schröder, A.; Bauer, K.; Spanier, G.; Proff, P.; Wolf, M.; Kirschneck, C. Expression kinetics of human periodontal ligament fibroblasts in the early phases of orthodontic tooth movement. *J. Orofac. Orthop.* **2018**, *79*, 337–351.
39. Seveau, S.; Turner, J.; Gavrilin, M.A.; Torrelles, J.B.; Hall-Stoodley, L.; Yount, J.S.; Amer, A.O. Checks and Balances between Autophagy and Inflammasomes during Infection. *J. Mol. Biol.* **2018**, *430*, 174–192.
40. Song, F.; Wang, Y.; Jiang, D.; Wang, T.; Zhang, Y.; Ma, H.; Kang, Y. Cyclic Compressive Stress Regulates Apoptosis in Rat Osteoblasts: Involvement of PI3K/Akt and JNK MAPK Signaling Pathways. *PLoS One* **2016**, *11*, e0165845.
41. Song, F.; Jiang, D.; Wang, Y.; Lou, Y.; Zhang, Y.; Kang, Y. Mechanical Stress Regulates Osteogenesis and Adipogenesis of Rat Mesenchymal Stem Cells through PI3K/Akt/GSK-3  $\beta/\beta$ -Catenin Signaling Pathway. *BioMed Res. Int.* **2017**, 1–10.

42. Tang, L.-L.; Xian, C.-Y.; Wang, Y.-L. The MGF expression of osteoblasts in response to mechanical overload. *Arch. Oral Biol.* **2006**, *51*, 1080–1085.
43. Uchiyama, Y.; Shibata, M.; Koike, M.; Yoshimura, K.; Sasaki, M. Autophagy–physiology and pathophysiology. *Histochem. Cell Biol.* **2008**, *129*, 407–420.
44. Ullrich, N.; Schroder, A.; Jantsch, J.; Spanier, G.; Proof, P.; Kirschneck, C. The role of mechanotransduction versus hypoxia during simulated orthodontic compressive strain-an in vitro study of human periodontal ligament fibroblasts. *Int. J. Oral Sci.* **2019**, *11*, 33.
45. Vercammen, E.; Staal, J.; Van Den Broeke, A.; Haegman, M.; Vereecke, L.; Schotte, P.; Bayaert, R. Prolonged exposure to IL-1b and IFNc induces necrosis of L929 tumor cells via a p38MAPK/NF- $\kappa$ B/NO-dependent mechanism. *Oncogene* **2008**, *27*, 3780–3788.
46. Wang, H.; Liu, Y.; Wang, D.; Xu, Y.; Dong, R.; Yang, Y.; Lv, Q.; Chen, X.; Zhang, Z. The Upstream Pathway of mTOR-Mediated Autophagy in Liver Diseases. *Cells* **2019**, *8*, 1597.
47. Wolf, M.; Lossdorfer, S.; Craveiro, R.; Gotz, W.; Jager, A. Regulation of macrophage migration and activity by high-mobility group box 1 protein released from periodontal ligament cells during orthodontically induced periodontal repair: an in vitro and in vivo experimental study. *J. Orofac. Orthop.* **2013**, *74*, 420–434.
48. Wu, Y.; Zhao, D.; Zhuang, J.; Zhang, F.; Xu, C. Caspase-8 and Caspase-9 Functioned Differently at Different Stages of the Cyclic Stretch-Induced Apoptosis in Human Periodontal Ligament Cells. *PLoS One* **2016**, *11*, e0168268.
49. Xiang, X.; Zhao, J.; Xu, G.; Li, Y.; Zhang, W. mTOR and the differentiation of mesenchymal stem cells. *Acta Biochim. Biophys. Sin. (Shanghai)* **2011**, *43*, 501–510.
50. Young, M.M.; Takahashi, Y.; Kahn, O.; Park, S.; Hori, T.; Yun, J.; Sharma, A.K.; Amin, S.; Hu, C.-D.; Zhang, J.; et al. Autophagosomal membrane serves as platform for intracellular death-inducing signaling complex (iDISC)-mediated caspase-8 activation and apoptosis. *J. Biol. Chem.* **2012**, *287*, 12455–12468.
51. Yang, L.; Miao, L.; Liang, F.; Huang, H.; Teng, X.; Li, S.; Nuriddinov, J.; Selzer, M.E.; Hu, Y. The mTORC1 effectors S6K1 and 4E-BP play different roles in CNS axon regeneration. *Nat. Commun.* **2014**.
52. Zhang, X.; Kohli, M.; Zhou, Q.; Graves, D.T.; Amar, S. Short- and Long-Term Effects of IL-1 and TNF Antagonists on Periodontal Wound Healing. *J. Immunol.* **2004**, *173*, 3514–3523.
